# Supplementary material for: Injury-induced pulmonary tuft cells are heterogenous, arise independent of key Type 2 cytokines, and are dispensable for dysplastic repair
Source: eLife journal article supplement (doi:10.7554/elife.78074), 2022-09-08
Supplement: supp [file elife-78074-supp-v1.zip]

Archive with 18 entries (18 files):
- elife_poa_e78074_Transparent_Reporting_File.pdf
- elife_poa_e78074_Figure_1_figure_supplement_1.ai
- elife_poa_e78074_Figure_2_figure_supplement_1.ai
- elife_poa_e78074_Figure_2_figure_supplement_2.ai
- elife_poa_e78074_Figure_3_figure_supplement_1.pdf
- elife_poa_e78074_Figure_3_figure_supplement_2.pdf
- elife_poa_e78074_Figure_3_figure_supplement_3.ai
- elife_poa_e78074_Figure_3_figure_supplement_4.ai
- elife_poa_e78074_Figure_3_figure_supplement_5.ai
- elife_poa_e78074_Figure_4_figure_supplement_1.ai
- elife_poa_e78074_Figure_3_source_data_1.xlsx
- elife_poa_e78074_Figure_3_figure_supplement_1_source_data_1.xlsx
- elife_poa_e78074_Figure_3_figure_supplement_3_source_data_1.xlsx
- elife_poa_e78074_Figure_3_figure_supplement_4_source_data_1.xlsx
- elife_poa_e78074_Figure_3_figure_supplement_5_source_data_1.xlsx
- elife_poa_e78074_Figure_4_source_data_1.xlsx
- elife_poa_e78074_Figure_4_figure_supplement_1_source_data_1.xlsx
- elife_poa_e78074_Figure_5_source_data_1.xlsx
