# Supplementary material for: Injury-induced pulmonary tuft cells are heterogenous, arise independent of key Type 2 cytokines, and are dispensable for dysplastic repair
Source: eLife journal article supplement (doi:10.7554/elife.78074), 2022-09-08
Supplement: supp [file elife-78074-supp-v1.zip › elife_poa_e78074_Figure_3_figure_supplement_1_source_data_1.xlsx]

## Sheet: % body weight loss
% body weight loss
7 dpi			9 dpi			16 dpi
Control	Pou2f3-/-		Control	Pou2f3-/-		Control	Pou2f3-/-
8.69565	26.3		4.3	36.8		0	31.6
20	25		30	29		10	12.5
24	17.6		28.6	23.5		12	0
13	12		28	16		-4.4	-8
23.8	16		13	16		9.5	0
14.3	22.2		33.3	27.8		-9.5	16.7
19	19		28.6	27.8		9.5	9.5
25	16.6		14.3	23.8
