# Supplementary material for: Injury-induced pulmonary tuft cells are heterogenous, arise independent of key Type 2 cytokines, and are dispensable for dysplastic repair
Source: eLife journal article supplement (doi:10.7554/elife.78074), 2022-09-08
Supplement: supp [file elife-78074-supp-v1.zip › elife_poa_e78074_Figure_3_figure_supplement_3_source_data_1.xlsx]

## Sheet: tuft cells per Krt5 area
		Tuft cells per area of Krt5 cells
		mouse #		WT	IL4RA KO	IL25 KO	POU2F3 KO
		9533		176.882
		9620		144.296
		9617			365.187
		9622			156.232
		9337					0
		9338					0
		9535					0
		9188				258.278
		9178				137.668
		9181				32.1502
		9618		144.52
		9536		242.8
		9619		137.11

## Sheet: % Krt5 area
		% Krt5 area
		mouse #		WT	IL4RA KO	IL25 KO	POU2F3 KO
		9533		3.41141
		9620		4.70888
		9617			0.354155
		9622			1.90485
		9337					11.59
		9338					2.12114
		9535					0.491803
		9188				0.674604
		9178				2.73447
		9181				1.0121
		9618		1.19889
		9536		2.63566
		9619		2.50361

## Sheet: Trpm5 analysis by hand
% Krt5 area				DCLK1 per Krt5 area
WT	Trpm5+/-	Trpm5-/-		WT	Trpm5+/-	Trpm5-/-
4.90787	7.40035	9.33119		301.13	415.235	97.3116
4.75759	0.953854	0.656635		260.926	303.61	113.153
	1.42303	6.83452			128.411	504.76
		4.36515				225.083
		0.662467				423.635
		4.60592				303.66
		5.67159				233.96

## Sheet: Il4ra analysis by hand
% Krt5 area				DCLK1 per Krt5 area
WT	IL4Rα+/-	IL4Rα-/-		WT	IL4Rα+/-	IL4Rα-/-
1.89695	5.59252	3.39528		385.87	264.741	406.694
	3.78204	2.29416			492.364	513.568
	1.81059	4.15105			433.869	289.527
