# Supplementary material for: Injury-induced pulmonary tuft cells are heterogenous, arise independent of key Type 2 cytokines, and are dispensable for dysplastic repair
Source: eLife journal article supplement (doi:10.7554/elife.78074), 2022-09-08
Supplement: supp [file elife-78074-supp-v1.zip › elife_poa_e78074_Figure_3_figure_supplement_4_source_data_1.xlsx]

## Sheet: Sheet1
Weight Loss
Day PI	Il4ra fl/fl					Il4ra fl/fl Rosa26-ERT2-Cre
0	100	100	100			100	100	100	100	100
3	102.02	96.3	103.31			97.99	102.66	103.57	102.76	101.08
5	102.02	96.3	103.31			98.39	98.94	102.68	97.79	96.24
6	95.97	89.42	103.31			90.36	102.13	100.45	98.34	90.86
7	86.29	82.01	102.07			81.93	93.09	93.75	92.27	82.8
9	84.68	77.78	100.41			76.31	83.51	92.41	90.61	79.57
10	87.9	74.6	99.59			73.49	87.77	96.88	91.16	76.88
12	95.97	77.25	106.61			77.91	102.66	108.93	101.66	85.48
14	99.6	76.72	108.68			82.73	109.57	109.82	91.16	94.62
16	102.82	85.71	109.92			87.95	114.36	116.07	100	101.08
18	104.84	89.95	109.5			91.16	114.36	114.73	100.28	105.38
21	103.63	98.41	109.92			90.36	117.55	114.29	100	108.6
23	104.84	105.82	110.74			98.8	120.21	116.52	111.05	112.37
25	104.84	110.05	109.92			102.81	122.87	129.02	114.92	114.52
qPCR for Il4ra
Il4ra fl/fl	R26-ERT2-Cre+
1.00394	0.670601
0.821569	0.282269
1.0683	0.303567
	0.479544
	0.593651
DCLK1+ cells / mm2 Krt5+ area
		IL4Ra fl/fl	R26-ERT2-Cre+
		148.078	84.5313
		289.46	309.14
		367.77	179.8
			187.837
			597.81
