# Supplementary material for: Injury-induced pulmonary tuft cells are heterogenous, arise independent of key Type 2 cytokines, and are dispensable for dysplastic repair
Source: eLife journal article supplement (doi:10.7554/elife.78074), 2022-09-08
Supplement: supp [file elife-78074-supp-v1.zip › elife_poa_e78074_Figure_3_figure_supplement_5_source_data_1.xlsx]

## Sheet: qPCR
Relative mRNA expression
Il4
0 dpi	3 dpi	8 dpi	12 dpi	21 dpi	51 dpi
0.969364	2.11333	3.41525	1.16283	1.12577	0.935339
1.0574	4.72555	4.50325	0.929187	1.65991	1.4359
1.11782	2.16978	2.67759	0.648064	3.84739	0.943369
0.872774	1.21873	4.97821	1.72943	1.68664	1.59385
Il5
0 dpi	3 dpi	8 dpi	12 dpi	21 dpi	51 dpi
1.02468	2.9445	2.54172	0.411449	0.722344	0.472528
0.841622	2.92557	3.0144	0.573267	0.948431	0.795131
1.19783	2.24344	2.13391	0.421193	2.26381	0.960386
0.968055	1.66759	3.51768	1.29382	0.890554	0.571308
Il13
0 dpi	3 dpi	8 dpi	12 dpi	21 dpi	51 dpi
0.956057	2.62898	18.3479	0.557899	1.05572	0.577159
0.893625	12.8411	20.5146	2.60257	1.17252	0.383565
0.925624	4.48177	12.5223	0.420392	2.18273	0.72141
1.26452	1.34799	27.0269	4.71408	1.73019	0.392714

## Sheet: Lung Viral Titer
Lung Viral Titer
Control (8 dpi)	Pou2f3-/- (8 dpi)	Control (12 dpi)	Pou2f3-/- (12 dpi)
661243	317731	0	0
66124.3	661243	0	0
0	661243	0	0
0	0	0	0
0

## Sheet: % Ki67+ of Krt5+
% Ki67+ of Krt5+
14 dpi			25 dpi
Control	Pou2f3-/-		Control	Pou2f3-/-
45.1634	49.5881		2.21753	2.34798
44.5005	30.3221		1.5457	1.37976
48.1532	50.0447		1.00908	5.4997
			1.99402	3.03167
				2.15176
