# Supplementary material for: Injury-induced pulmonary tuft cells are heterogenous, arise independent of key Type 2 cytokines, and are dispensable for dysplastic repair
Source: eLife journal article supplement (doi:10.7554/elife.78074), 2022-09-08
Supplement: supp [file elife-78074-supp-v1.zip › elife_poa_e78074_Figure_3_source_data_1.xlsx]

## Sheet: tuft cells per Krt5 area
DCLK1+ cells / mm2 Krt5+ area
	Control	Pou2f3-/-		Control	Trpm5-/-		Control	Il4ra-/-		Control	Il25-/-
	214.517	0		320.205	116.2		95.0607	443.344		176.882	258.278
	180.187	0		189.365	385.504		449.724	201.736		144.296	137.668
	376.75	0		134.385	688.99		222.391	236.753		144.52	32.1502
	485.549	0		522.172	852.072		309.498			242.8
	184.755	0		814.588	644.614					137.11
	183.602	0			127.209
	277.704	0			173.003
	370.69	0
	174.984
	337.043
	493.808

## Sheet: % Krt5 area
% Krt5+ area
	Control	Pou2f3-/-		Control	Trpm5-/-		Control	Il4ra-/-		Control	Il25-/-
	5.57129	9.76937		8.12075	8.22988		2.56469	2.26682		3.41141	0.674604
	4.57536	1.36992		1.60035	1.05825		1.38458	2.73945		4.70888	2.73447
	1.16453	0.0951726		0.776856	1.57768		5.09026	3.60297		1.19889	1.0121
	4.66621	0.164165		3.9485	2.07335		2.84181			2.63566
	0.958474	3.80605		1.3997	4.69102					2.50361
	5.62827	2.46068			0.350109
	4.30881	0.569389			2.94778
	0.496593	3.38714
	0.126508
	0.765129
	1.29395
