# Supplementary material for: Injury-induced pulmonary tuft cells are heterogenous, arise independent of key Type 2 cytokines, and are dispensable for dysplastic repair
Source: eLife journal article supplement (doi:10.7554/elife.78074), 2022-09-08
Supplement: supp [file elife-78074-supp-v1.zip › elife_poa_e78074_Figure_4_figure_supplement_1_source_data_1.xlsx]

## Sheet: Sheet1
Weight loss
	Days PI	Control			Il28r -/-
	0	100	100	100	100	100	100
	4	98.77	104.02	102.55	97.71	97.48	100.43
	6	90.16	97.59	100.36	90.37	90.34	92.27
	7	84.02	90.36	91.24	84.4	86.13	86.7
	8	78.69	83.13	83.58	80.28	80.25	81.12
	9	75.8197	79.1165	80.6569	81.1927	80.2521	83.2618
	11	74.1803	78.7149	85.7664	82.1101	84.8739	82.4034
	12	74.5902	85.5422	89.781	83.945	87.395	85.4077
	14	76.2295	93.5743	95.6204	94.9541	93.2773	92.7039
	15	76.6393	95.9839	95.9854	97.7064	95.3782	95.279
	16	78.2787	97.1888	100	100	97.479	97.4249
	19	84.4262	96.3855	98.5401	102.752	100	100.429
	21	84.0164	97.5904	98.1752	104.587	101.681	101.288
	22	87.2951	97.992	95.9854	105.046	105.042	102.575
	Days PI	BL/6			Ifnar-/-
	0	100	100	100	100	100
	3	97.15	98.05	100.38	103.25	102.51
	5	95.37	99.22	95.38	95.93	97.91
	6	92.53	97.66	89.62	88.21	93.31
	7	84.34	87.89	84.23	83.74	84.94
	8	80.0712	82.4219	78.8462	78.8618	78.6611
	9	80.427	80.8594	76.5385	77.6423	76.1506
	10	85.7651	83.2031	76.1538	78.0488	73.2218
	11	90.7473	87.5	81.9231	78.4553	72.3849
	13	94.306	93.75	86.1538	83.3333	74.8954
	14	93.9502	96.0938	90.7692	85.7724	75.3138
	15	94.6619	97.2656	94.2308	87.8049	80.3347
	17	91.1032	94.1406	93.8462	86.1789	81.59
	20	93.5943	95.3125	94.6154	93.4959	87.8661
	22	95.0178	95.7031	95.3846	97.561	88.2845
