# Supplementary material for: Injury-induced pulmonary tuft cells are heterogenous, arise independent of key Type 2 cytokines, and are dispensable for dysplastic repair
Source: eLife journal article supplement (doi:10.7554/elife.78074), 2022-09-08
Supplement: supp [file elife-78074-supp-v1.zip › elife_poa_e78074_Figure_4_source_data_1.xlsx]

## Sheet: Sheet1
DCLK1+ cells / mm2 Krt5+ area
		Control	Il28r-/-		Control	Ifnar1-/-
		629.697	527.578		883.047	675.844
		628.172	925.386		831.348	841.171
		548.786	668.273		364.352	539.54
		610.861	709.964		677.474
		344.38	467.105
			824.838
