# Supplementary material for: Injury-induced pulmonary tuft cells are heterogenous, arise independent of key Type 2 cytokines, and are dispensable for dysplastic repair
Source: eLife journal article supplement (doi:10.7554/elife.78074), 2022-09-08
Supplement: supp [file elife-78074-supp-v1.zip › elife_poa_e78074_Figure_5_source_data_1.xlsx]

## Sheet: Agr2 area per Krt5 area
Agr2+ area/Krt5+ area
	Control	Pou2f3-/-		Control	Trpm5-/-		Control	Il4ra-/-
	0.25178	0.205098		0.328839	1.57198		0.12468	0.47201
	0.406975	0.144746		0.159842	2.36908		0.71701	0.28061
	2.36963	0.152132		0.560365	0.105773		1.94219	0.0682
	1.51661	0.668914		1.15264	0.057455		0.14756
	0.11309	0.825904			0.90666
	0.542122	0.959026			0.010381
	0.502278	0.0406992
	0.15515	0.0402122

## Sheet: Relative mRNA Abundance, Bactin
Relative mRNA Abundance, Bactin
		Control								Pou2f3 KO
	Krt5	1.27529	0.734974	0.98974	0.60478	1.38235	0.77574	1.03523	1.2019	0.749881	0.884531	0.7178	1.53519
	Foxa3	0.809562	0.838413	1.35202	0.900411	1.0719	1.08596	0.719004	1.22273	0.863797	1.38722	0.703133	0.471558
	Agr2	0.796906	0.871722	1.33137	0.581143	1.36914	0.480866	0.757714	1.81114	0.76949	0.933406	0.675356	1.26198
	Muc5ac	1.41323	0.950054	0.636711	0.697788	1.19497	0.00941138	0.179047	2.91878	0.775763	0.465506	0.463846	1.03536
	Muc5b	1.10694	0.965113	0.927947	0.780984	1.25222	1.01935	0.807061	1.14039	1.0541	1.24291	0.901241	1.12748

## Sheet: Relative mRNA abundance, Krt5
Relative mRNA abundance, Krt5
		Control								Pou2f3 KO
	Foxa3	0.651242	1.10145	1.2473	1.38469	0.721183	1.30199	0.645959	0.946175	1.13398	1.50507	0.911054	0.714833
	Agr2	0.637971	1.1397	1.22233	0.99886	1.02955	0.644358	0.76083	1.5664	1.00531	1.00782	0.978022	0.854498
	Muc5ac	1.12919	1.21913	0.651679	1.24551	0.933174	0.0130966	0.186703	2.62152	0.989448	0.539019	0.697575	0.728032
	Muc5b	0.951724	1.17	0.878277	1.23228	0.864428	1.25393	0.743937	0.905421	0.73738	1.36103	1.19813	0.700831
