# Supplementary figures and images for: Injury-induced pulmonary tuft cells are heterogenous, arise independent of key Type 2 cytokines, and are dispensable for dysplastic repair
Source: eLife journal article supplement (doi:10.7554/elife.78074), 2022-09-08

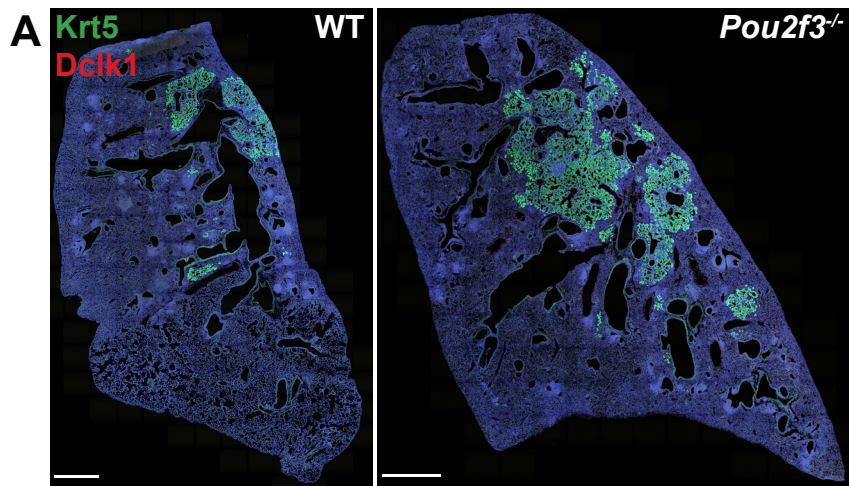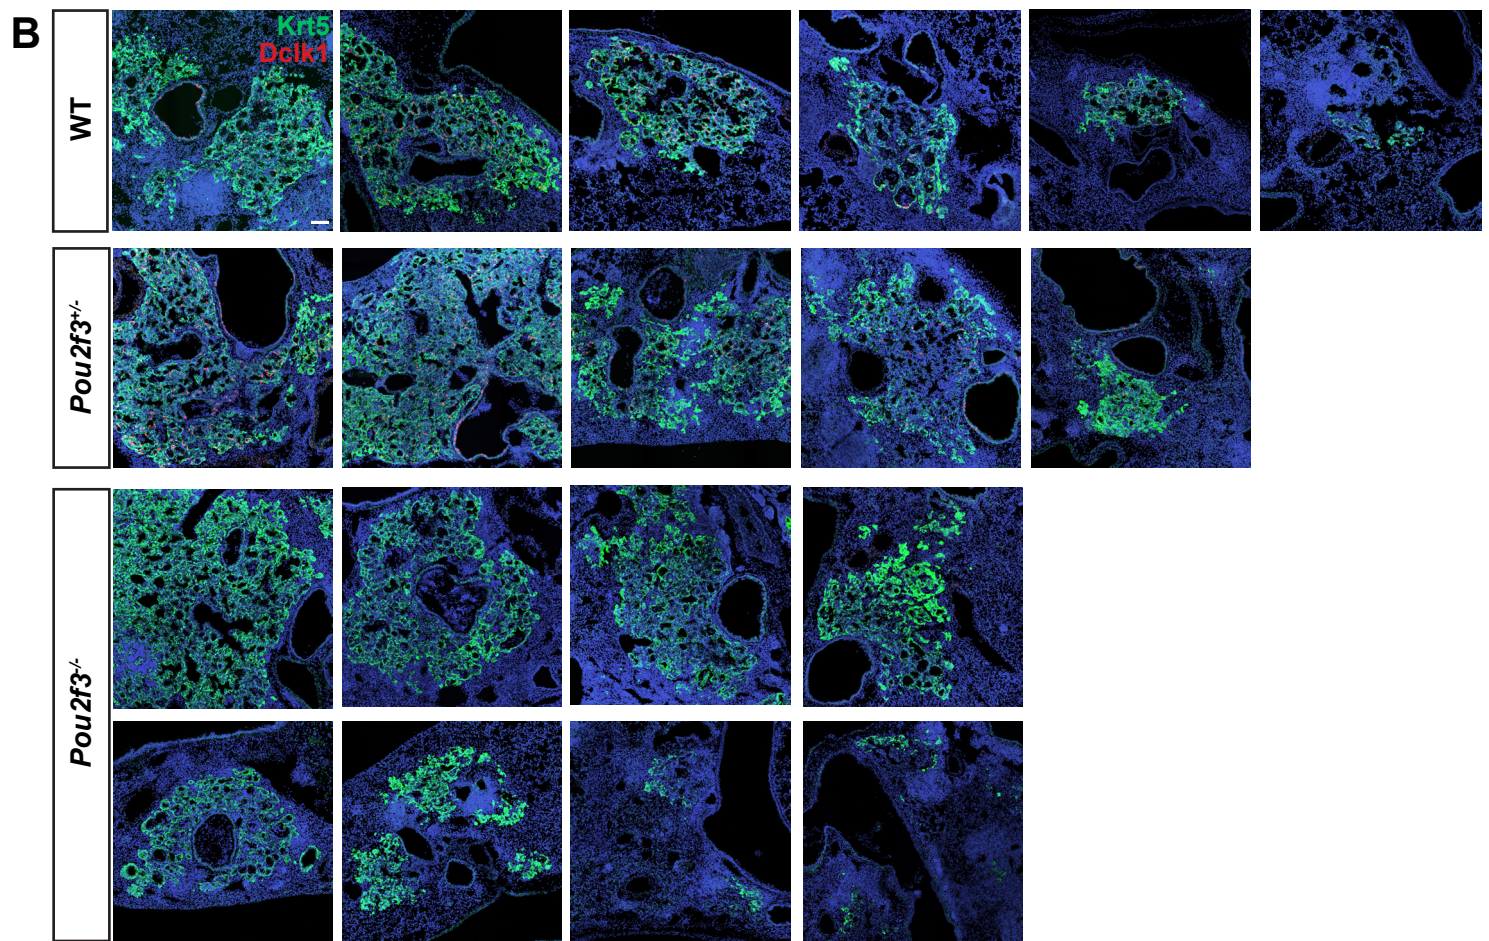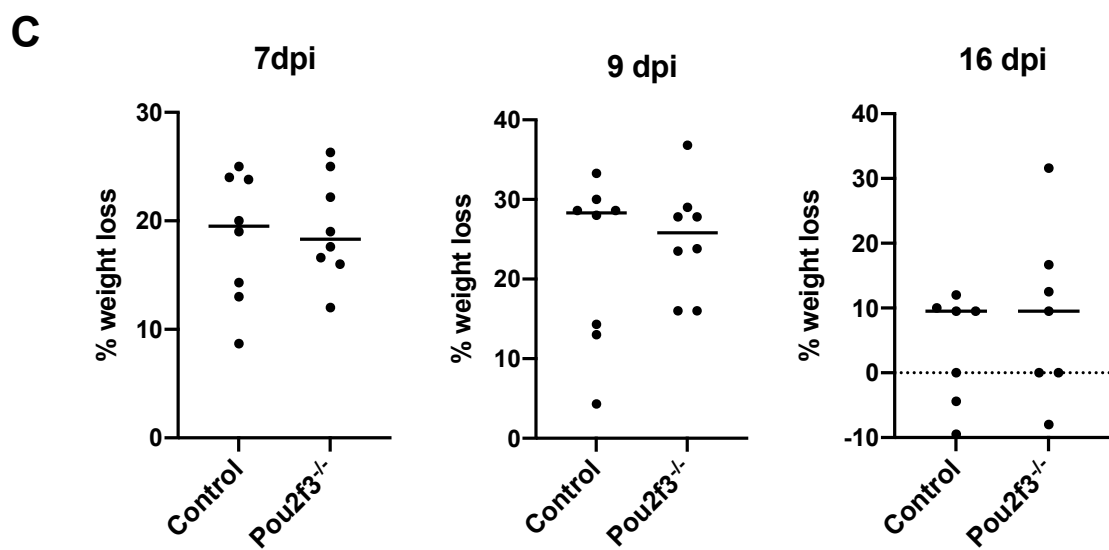

Supplement: supp [file elife-78074-supp-v1.zip › elife_poa_e78074_Figure_3_figure_supplement_1.pdf]

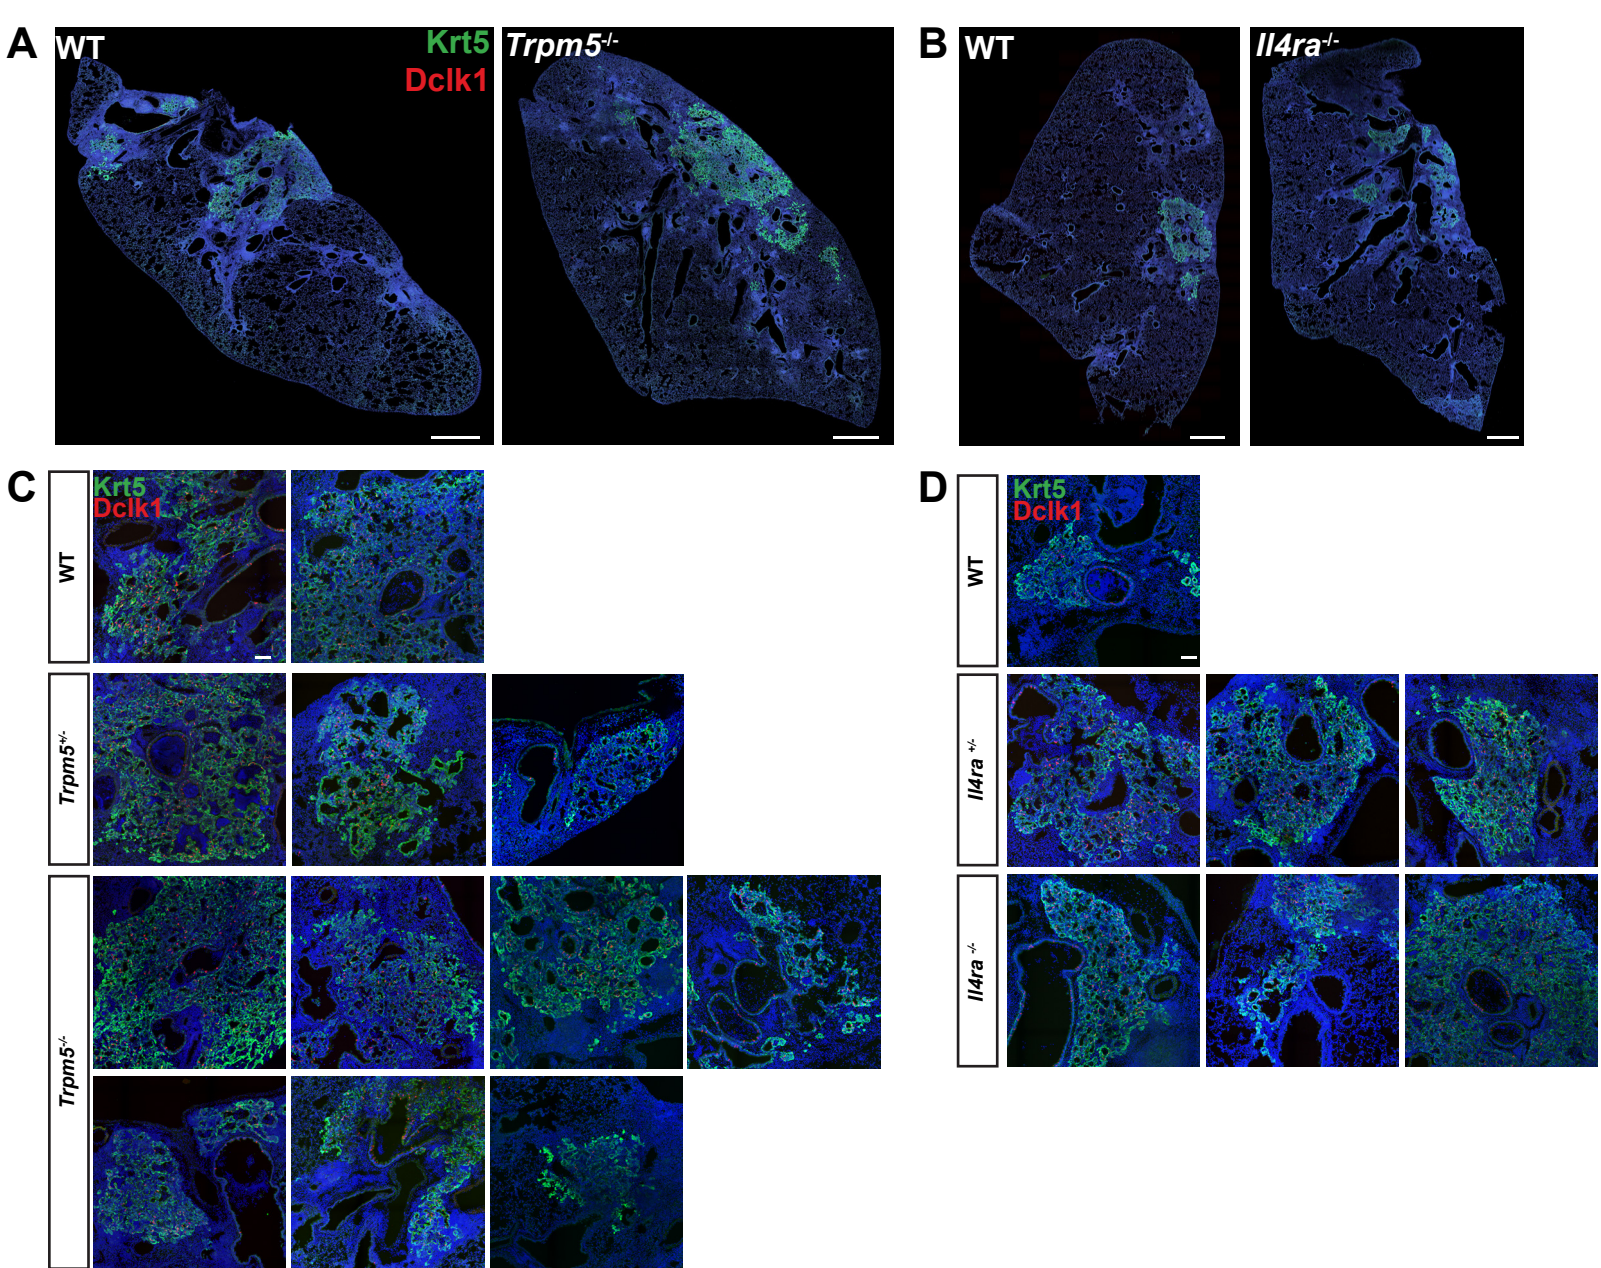

Supplement: supp [file elife-78074-supp-v1.zip › elife_poa_e78074_Figure_3_figure_supplement_2.pdf]
